# Supplementary material
Source: MDPI journal article supplement (https://www.mdpi.com/1424-8247/17/5/634)
Supplement: s1 [file s1]

**Figure S1.**  $^1\text{H}$  NMR spectrum of LCC (acetone- $d_6$ ; 600 MHz)

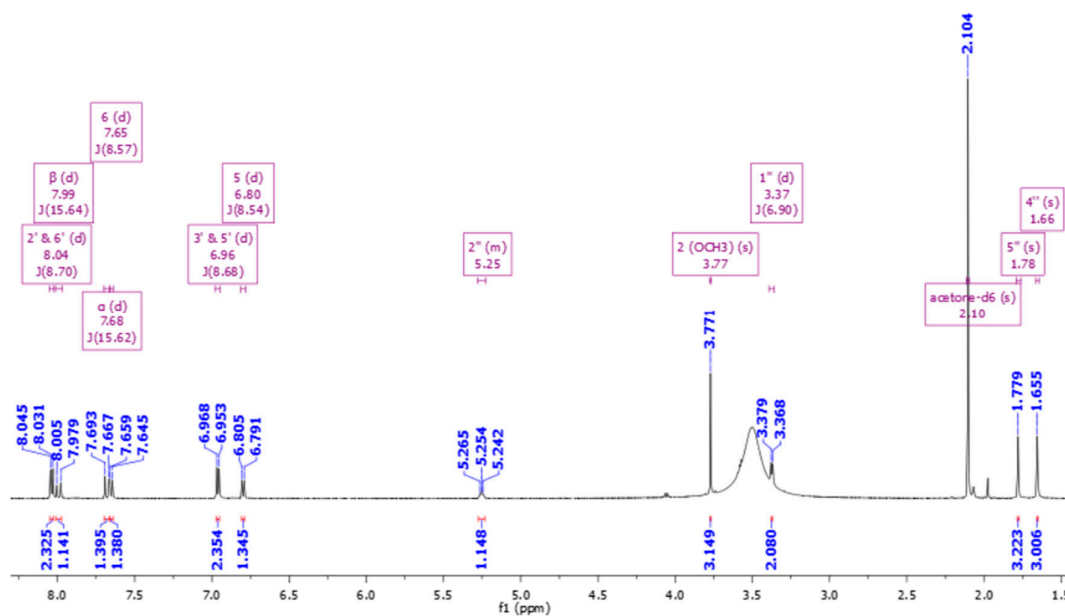

Figure S2. Amplification of  $^1\text{H}$  spectrum of LCC (1.5 – 8.0 ppm) ( $\text{acetone-}d_6$ ; 600 MHz)

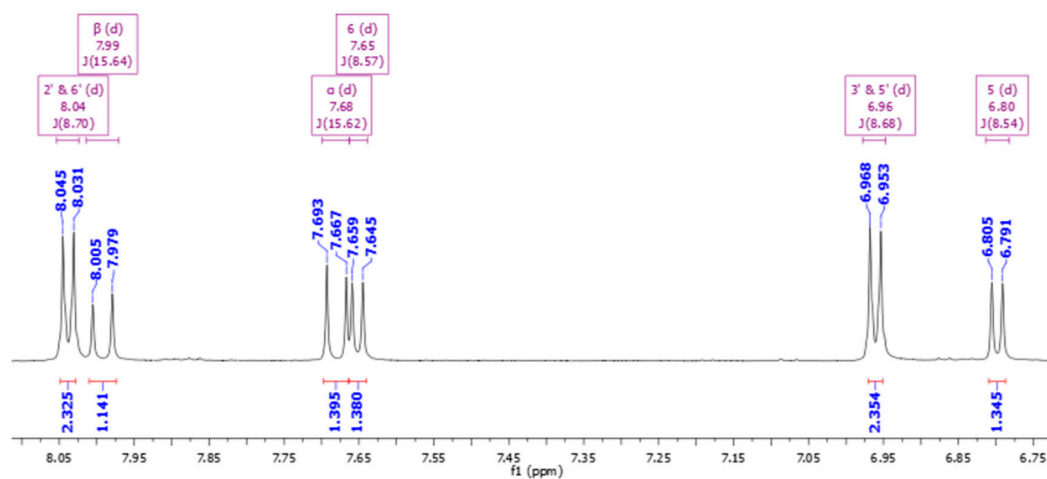

Figure S3. Amplification of  $^1\text{H}$  spectrum of LCC (6.75 – 8.05 ppm) ( $\text{acetone-}d_6$ ; 600 MHz)

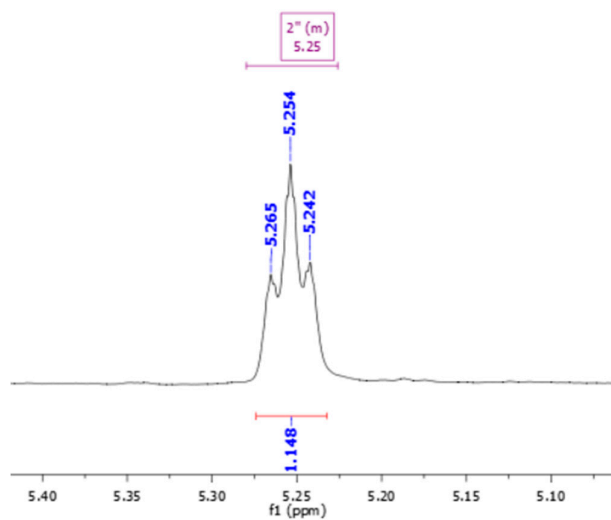

**Figure S4.** Amplification of <sup>1</sup>H spectrum of LCC (5.1 – 5.4 ppm) (acetone-*d*<sub>6</sub>; 600 MHz)

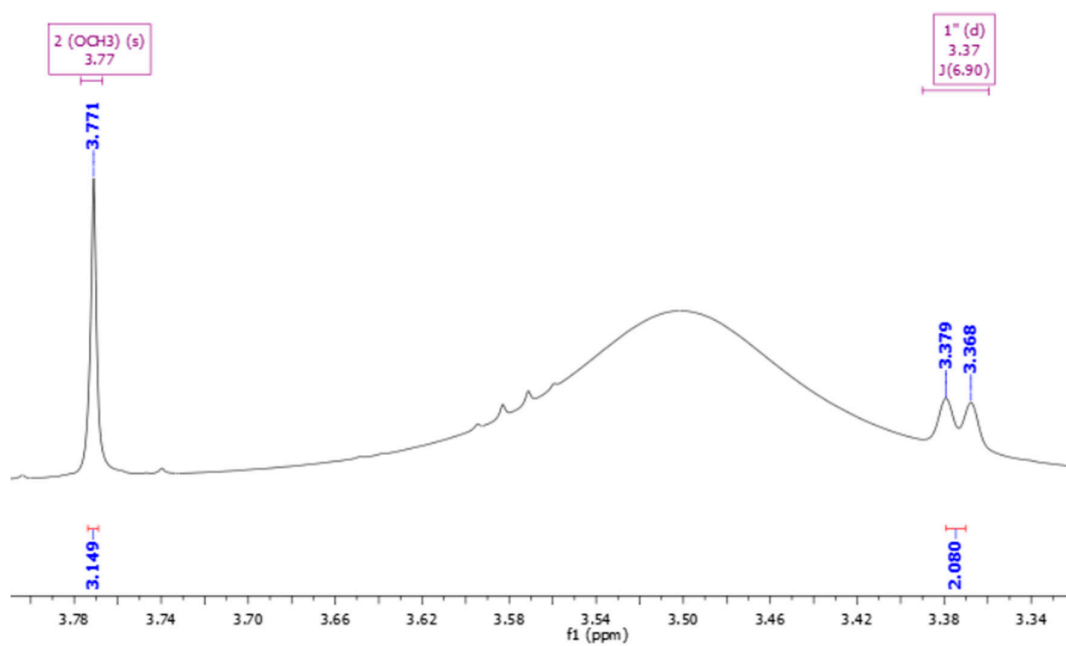

**Figure S5.** Amplification of <sup>1</sup>H NMR spectrum of LCC (3.34 – 3.78 ppm) (acetone-*d*<sub>6</sub>; 600 MHz)

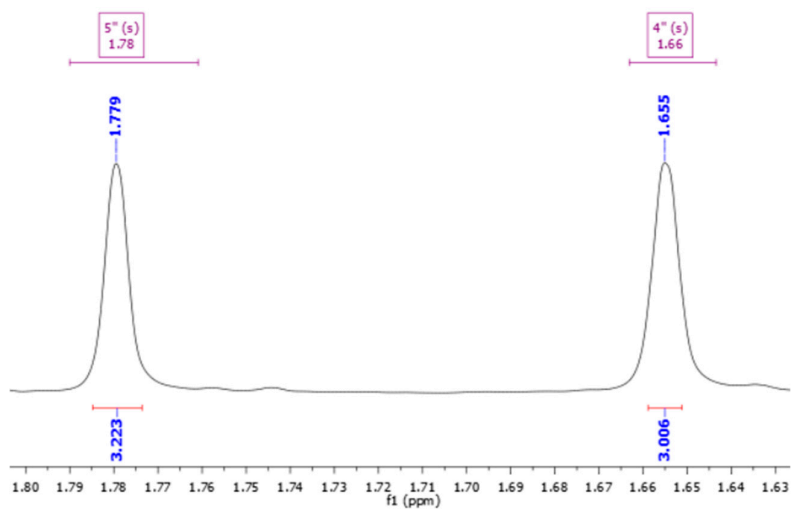

**Figure S6.** Amplification of  $^1\text{H}$  NMR spectrum of LCC (1.8 – 1.6 ppm) (acetone- $d_6$ ; 600 MHz)

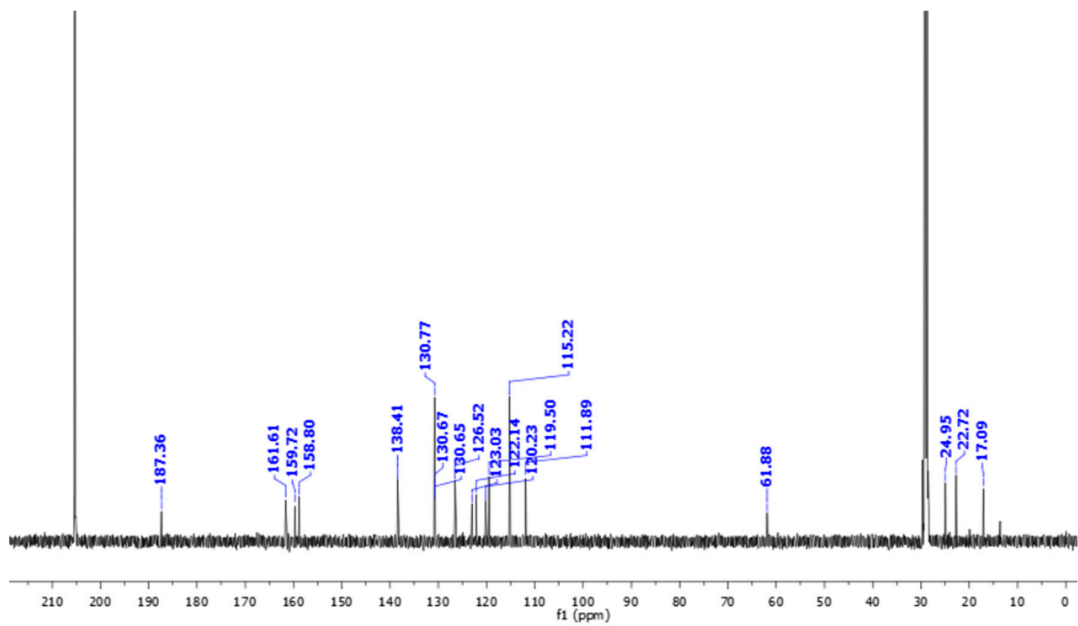

**Figure S7.**  $^{13}\text{C}$  NMR spectrum of LCC (acetone- $d_6$ ; 150 MHz)

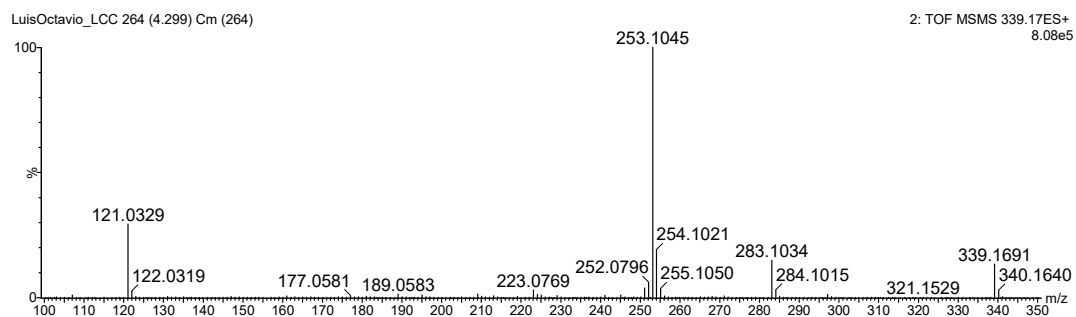

**Figure S8.** MS spectrum of LCC performed by electrospray (positive mode).
